# Supplementary material
Source: publisher site journal article supplement (https://www.dovepress.com/article/198312)
Supplement: Supplementary file 1 [file get_supplementary_file.php]

**Clinical and Economic Burden of Head and Neck Cancer: a Nationwide Retrospective Cohort Study from France.** Schernberg A et al.

**Supplementary material contents**

[Supplementary Methods: Imputation of mortality outside hospital 2](#_Toc4575984)

[Overview 2](#_Toc4575985)

[Methods 2](#_Toc4575986)

[Morbidity profile of patients with HNSCC discharged in 2008 3](#_Toc4575987)

[Imputation of mortality outside hospital from 2008 to 2013 3](#_Toc4575988)

[Cross-validation of mortality rates at 3 years 3](#_Toc4575989)

[Reference 3](#_Toc4575990)

[Supplementary Methods Table 1. Morbidity profile of patients discharged with HNSCC in 2008, by vital status (N=40 811) 5](#_Toc4575991)

[Supplementary Methods Table 2. Risk of in-hospital death in 2008 among patients with HNSCC and known vital status in 2008 (N=35 515) 8](#_Toc4575992)

[Supplementary Methods Table 3. Vital status of patients discharged with HNSCC, by year 10](#_Toc4575993)

[Supplementary Methods Table 4. Cross-validation of mortality rates at 3 years for HNSCC between French cancer registries and the study population 11](#_Toc4575994)

[Supplementary Table 1: Coding dictionary 13](#_Toc4575995)

[Reference 14](#_Toc4575996)

[Supplementary Table 2: Imputation of radiation therapy in the private sector 15](#_Toc4575997)

## Supplementary Methods: Imputation of mortality outside hospital

### Overview

Hospital admission remains frequent at end-of-life in France, overall and for cancer patients in particular. A majority of deaths occur at hospital, with stable figures over the last three decades.[1](#_ENREF_1_1) In addition, about two-third patients receive hospital care in the month preceding death.[2](#_ENREF_1_2),[3](#_ENREF_1_3) In cancer patients, the role of hospital is even exacerbated at end-of-life: death was recorded at hospital for 73% deceased patients in 1993-2008, without changes over time,[4](#_ENREF_1_4) and above 90% patients received hospital care in the month preceding death in 2009.[2](#_ENREF_1_2),[3](#_ENREF_1_3) We relied on this particular feature of the French healthcare system to impute mortality outside hospital among patients lost to follow-up based on their morbidity profile at last hospital discharge.[5](#_ENREF_1_5)

### Methods

The French National Hospital Discharge database contains all public and private hospital claims for acute and post-acute care from 2008 to 2013. Accordingly, the vital status of each patient diagnosed with HNSCC can be followed with use all his/her admissions to hospital until in-hospital death or last hospital discharge in 2008-2013. In patients alive at last hospital discharge, all hospital records are informative on their morbidity profile and therefore immediate mortality risk outside hospital.[6](#_ENREF_1_6)

We used a sequential approach by year of hospital admission to impute mortality outside hospital among all patients with a diagnosis of HNSCC and lost to follow-up in the same year. Expectedly, patients admitted to hospital in 2008 had the lowest level of attrition as they may be followed at hospital over the next five years (2009-2013). Therefore, we characterised the morbidity profile of patients with known vital status in 2008 with use of all hospital records of 2008 and estimated the probability of death in a given year with use of multivariate logistic regression. Then we imputed mortality outside hospital at an optimal cut-off (min ) based on the morbidity profile of patients lost to follow-up at hospital from 2008 to 2013. Finally, because the proportion of patients lost to follow-up at hospital increases exponentially in 2013, we censored all information on vital status at July 1, 2013 in the study population selected in 2010-12, i.e., after the initial treatment period of six months necessary to characterise patients first diagnosed with HNSCC in December 2012.

To characterize morbidity profiles, a large amount of information was retrieved from all hospital records in a given year:

1. *Demographics*: gender, age in January, zip code of residency categorized in French regions.
2. *Primary cancer other than HNSCC*: lung cancer, oesophageal cancer, and any other primary cancer.[7](#_ENREF_1_7)
3. *Cancer stage*: distant metastasis (ICD-10 C78-C79), and otherwise lymph nodes (ICD-10 C77).
4. *Causes-of-death other than cancer.* We relied on the Global Burden of Disease study methodology to disentangle ICD-10 codes acceptable as an underlying cause-of-death from “garbage codes”.[8](#_ENREF_1_8),[9](#_ENREF_1_9) Acceptable causes-of-death and conditions that are intermediate causes of death (e.g., ICD-10 N17 for acute renal failure) were recorded by ICD-10 chapter. In absence of an acceptable cause-of-death, conditions that cannot be considered as the underlying cause-of-death were recorded by ICD-10 chapter (e.g., ICD-10 K02 codes for dental caries).
5. *Other prognostic factors*. Several factors of ICD-10 chapters XVIII and XXI were recorded: palliative care (ICD-10 Z51.5); chronic dialysis (medical procedures); transplantation status (ICD-10 Z94; T86 and medical procedures); poor general condition (ICD-10 R53.+0); shock (ICD-10 R57); bedridden (ICD-10 R26..30 or Z74.00); senility (ICD-10 R54).
6. *Hospital trajectory in the year*: total length of stay in acute inpatient care (in nights); admission in acute day case care (without inpatient care admission); emergency room admission; post-acute care admission; day case care at home; and nursing home admission.

In preliminary analyses, we found that patients lost to follow-up in palliative care or chronic dialysis had dramatic immediate mortality risks. Of 30 238 patients recorded in palliative care before October 2013, in-hospital death rate was 90% within 3 months. Of 618 patients on chronic dialysis at last discharge before October 2013, in-hospital death rate was 73%. We assumed that these patients lost to follow-up in palliative care or chronic dialysis before October 2013 all died immediately after hospital discharge.

### Morbidity profile of patients with HNSCC discharged in 2008

Of 40 811 patients discharged with HNSCC in 2008, 8 750 (21.4%) died at hospital in 2008, 26 765 (65.6%) were alive by the end of 2008 (ie, they had hospital records in 2009-2013), and 5 296 (13.0%) were lost to follow-up at hospital in 2008 (**Table 1**). Patients lost to follow-up in 2008 were rather in better health than patients alive by the end of 2008 and even more so when compared to patients who died in 2008.

### Imputation of mortality outside hospital from 2008 to 2013

**Table 2** shows the results of the multivariate logistic regression on the probability of in-hospital death among 35 515 patients with known vital status in 2008. Overall, the concordance reached 88.5% between observed and predicted deaths in 2008. At the optimal cut-off (ie, 20.5% predicted probability of death), sensitivity and specificity were 79.8% and 76.9%, respectively.

Mortality outside hospital was imputed at the optimal cut-off based on the morbidity profile of patients lost to follow-up at hospital from 2008 to 2013 (**Table 3**). Of 5 296 patients lost to follow-up at hospital in 2008, 1 450 (27.4%) deaths were imputed. While the proportion of patients lost to follow-up at hospital increased slightly from 2008 to 2012, it increased exponentially in 2013 and all information on vital status was censored at July 1, 2013.

### Cross-validation of mortality rates at 3 years

**Table 4** shows the mortality rates at 3 years estimated in the study population (Kaplan-Meier method) and reported in French cancer registries.[10](#_ENREF_1_10) Overall, mortality rates at 3 years estimated in the study population significantly increased from 43.6% (95% CI, 42.9-44.3) with use of in-hospital death records to 53.1% (95% CI 52.5-53.6) after imputation of mortality outside hospital and censoring at July 1, 2013. After imputation of mortality outside hospital, mortality rates at 3 years were similar between the study population and pooled estimates from French cancer registries, overall and by primary HNSCC site.

### Reference

Reference List

**1.** Institut national de la statistique et des études économiques. Répartition des décès selon le lieu du décès [Distribution of deaths according to location]. 2014; https://insee.fr/fr/statistiques/2117277?sommaire=2117290.

**2.** Pennec S, Monnier A, Pontone S, Aubry R. End-of-life medical decisions in France: a death certificate follow-up survey 5 years after the 2005 act of parliament on patients' rights and end of life. *BMC palliative care.* Dec 3 2012;11:25.

**3.** Observatoire National de la Fin de Vie. *Rapport 2012: vivre la fin de vie chez soi. [2012 Report: living end-of-life at home].* [*http://www.ladocumentationfrancaise.fr/rapports-publics/134000186-observatoire-national-de-la-fin-de-vie-rapport-2012-vivre-la-fin-de-sa-vie-chez-soi*](http://www.ladocumentationfrancaise.fr/rapports-publics/134000186-observatoire-national-de-la-fin-de-vie-rapport-2012-vivre-la-fin-de-sa-vie-chez-soi)*.* Observatoire National de la Fin de Vie,;2013.

**4.** Gisquet E, Aouba A, Aubry R, Jougla E, Rey G. Où meurt-on en France ? Analyse des certificats de décès (1993-2008) [Where do we die in France? Analysis of death certificates (1993-2008)]. <http://invs.santepubliquefrance.fr/Publications-et-outils/BEH-Bulletin-epidemiologique-hebdomadaire/Archives/2012/BEH-n-48-2012>. *Bulletin Epidémiologique Hebdomadaire.* Dec. 11, 2012 2012;48:547-551.

**5.** Schwarzinger M, Baillot S, Yazdanpanah Y, Rehm J, Mallet V. Contribution of alcohol use disorders on the burden of chronic hepatitis C in France, 2008-2013: A nationwide retrospective cohort study. *Journal of hepatology.* Sep 2017;67(3):454-461.

**6.** Schildcrout JS, Basford MA, Pulley JM, et al. An analytical approach to characterize morbidity profile dissimilarity between distinct cohorts using electronic medical records. *Journal of biomedical informatics.* Dec 2010;43(6):914-923.

**7.** Jegu J, Colonna M, Daubisse-Marliac L, et al. The effect of patient characteristics on second primary cancer risk in France. *BMC cancer.* 2014;14:94.

**8.** Lozano R, Naghavi M, Foreman K, et al. Global and regional mortality from 235 causes of death for 20 age groups in 1990 and 2010: a systematic analysis for the Global Burden of Disease Study 2010. *Lancet.* Dec 15 2012;380(9859):2095-2128.

**9.** Naghavi M, Makela S, Foreman K, O'Brien J, Pourmalek F, Lozano R. Algorithms for enhancing public health utility of national causes-of-death data. *Population health metrics.* May 10 2010;8:9.

**10.** Cowppli-Bony A, Uhry Z, Remontet L, et al. *Survie des personnes atteintes de cancer en France métropolitaine, 1989-2013. Étude à partir des registres des cancers du réseau Francim. Partie 1 – Tumeurs solides.* Réseau français des registres des cancers (Francim), service de biostatistique des Hospices civils de Lyon (HCL), Institut de veille sanitaire (InVS), Institut national du cancer (INCa);2016.

###

### Supplementary Methods Table 1. Morbidity profile of patients discharged with HNSCC in 2008, by vital status (N=40 811)

| **Morbidity profile** | | **In-hospital death in 2008** | **Alive by the end of 2008** | **Lost to follow-up in 2008** | **P-value** |
| --- | --- | --- | --- | --- | --- |
| **N=8 750** | **N=26 765** | **N=5 296** |
| **Men** | | 7 289 (83.3) | 21 725 (81.2) | 4 195 (79.2) | <0.0001 |
| **Age in January 2008, mean (std) years** | | 64.3 (11.9) | 61.4 (11.5) | 61.5 (12.8) | <0.0001 |
| **French region** | |  |  |  |  |
|  | Paris area | 1 337 (15.3) | 3 885 (14.5) | 818 (15.5) | <0.0001 |
|  | North-West | 2 268 (25.9) | 6 454 (24.1) | 1 516 (28.6) |
|  | North-East | 2 376 (27.2) | 7 117 (26.6) | 1 203 (22.7) |
|  | South-West | 819 (9.4) | 2 587 (9.7) | 467 (8.8) |
|  | South-East | 1 893 (21.6) | 6 555 (24.5) | 1 247 (23.6) |
|  | French West Indies | 57 (0.7) | 167 (0.6) | 57 (0.9) |  |
| **Other cancer (by ICD-10 chapter)** | |  |  |  |  |
|  | Lung cancer (II) | 1 072 (12.3) | 1 474 (5.5) | 207 (3.9) | <0.0001 |
| Esophageal cancer (II) | 531 (6.1) | 809 (3.0) | 115 (2.2) | <0.0001 |
| Cancer other than HNSCC lung or esophageal (II) | 1 688 (19.3) | 3 875 (14.5) | 606 (11.4) | <0.0001 |
| Metastasis (II) | 3 316 (37.9) | 2 345 (8.8) | 518 (9.8) | <0.0001 |
| Lymph nodes (without metastasis) (II) | 1 143 (13.1) | 4 314 (16.1) | 706 (13.3) | <0.0001 |
| **Other causes-of-death (by ICD-10 chapter)** | |  |  |  |  |
|  | HIV/AIDS (I) | 40 (0.5) | 115 (0.4) | 12 (0.2) | 0.078 |
| Infectious diseases other than HIV (I) | 2 506 (28.6) | 3 167 (11.8) | 573 (10.8) | <0.0001 |
| Blood disorders (III) | 1 964 (22.5) | 2 725 (10.2) | 482 (9.1) | <0.0001 |
| Malnutrition (IV) | 2 840 (32.5) | 3 915 (14.6) | 714 (13.5) | <0.0001 |
| Endocrine and metabolic disorders (IV) | 2 291 (26.2) | 6 073 (22.7) | 872 (16.5) | <0.0001 |
| Mental and behavioral disorders (V) | 2 578 (29.5) | 8 485 (31.7) | 1 326 (25.0) | <0.0001 |
| Diseases of the nervous system (VI) | 968 (11.1) | 1 589 (5.9) | 298 (5.6) | <0.0001 |
| Diseases of the circulatory system (IX) | 2 525 (28.9) | 6 183 (23.1) | 912 (17.2) | <0.0001 |
| Diseases of the respiratory system (X) | 2 086 (23.8) | 6 084 (22.7) | 936 (17.7) | <0.0001 |
| Diseases of the liver (XI) | 634 (7.3) | 1 257 (4.7) | 184 (3.5) | <0.0001 |
| Other diseases of the digestive system (XI) | 1 978 (22.6) | 5 316 (19.9) | 744 (14.1) | <0.0001 |
| Diseases of the skin and subcutaneous tissue (XII) | 551 (6.3) | 703 (2.6) | 125 (2.4) | <0.0001 |
| Diseases of the musculoskeletal system and connective tissue (XIII) | 333 (3.8) | 887 (3.3) | 111 (2.1) | <0.0001 |
| Diseases of the urinary system (XIV) | 473 (5.4) | 1 026 (3.8) | 129 (2.4) | <0.0001 |
| Gynecological diseases (XIV) | 6 (0.1) | 52 (0.2) | 10 (0.2) | <0.05 |
| External causes of mortality (XX) | 912 (10.4) | 1 963 (7.3) | 286 (5.4) | <0.0001 |
| **Intermediate causes-of-death (by ICD-10 chapter)** | |  |  |  |  |
|  | Infectious diseases other than HIV (I) | 607 (6.9) | 484 (1.8) | 91 (1.7) | <0.0001 |
| Endocrine and metabolic disorders (IV) | 841 (9.6) | 813 (3.0) | 159 (3.0) | <0.0001 |
| Diseases of the circulatory system (IX) | 555 (6.3) | 662 (2.5) | 92 (1.7) | <0.0001 |
| Diseases of the respiratory system (X) | 1 556 (17.8) | 1 140 (4.3) | 230 (4.3) | <0.0001 |
| Diseases of the liver (XI) | 183 (2.1) | 129 (0.5) | 19 (0.4) | <0.0001 |
| Diseases of the urinary system (XIV) | 804 (9.2) | 973 (3.6) | 165 (3.1) | <0.0001 |
| **Other prognostic factors (ICD-10 chapters XVIII and XXI)** | |  |  |  |  |
|  | Transplantation status | 31 (0.4) | 140 (0.5) | 11 (0.2) | <0.01 |
|  | Poor health condition | 2 568 (29.4) | 1 818 (6.8) | 428 (8.1) | <0.0001 |
| Shock | 2 022 (23.1) | 1 215 (4.5) | 208 (3.9) | <0.0001 |
| Bedridden | 515 (5.9) | 133 (0.5) | 52 (1.0) | <0.0001 |
|  | Senility | 48 (0.6) | 36 (0.1) | 7 (0.1) | <0.0001 |
| **Hospital trajectory (admission)** | |  |  |  |  |
|  | Inpatient care | 8 423 (96.3) | 23 694 (88.5) | 4 356 (82.3) | <0.0001 |
| Day case admission without inpatient care | 3 443 (39.4) | 13 013 (48.6) | 1 991 (37.6) | <0.0001 |
| Emergency room | 3 765 (43.0) | 5 027 (18.8) | 869 (16.4) | <0.0001 |
| Post-acute care | 2 033 (23.2) | 3 845 (14.4) | 553 (10.4) | <0.0001 |
| Day case care at home | 974 (11.1) | 784 (2.8) | 74 (1.4) | <0.0001 |
| Nursing home | 302 (3.5) | 361 (1.4) | 181 (3.4) | <0.0001 |

### Supplementary Methods Table 2. Risk of in-hospital death in 2008 among patients with HNSCC and known vital status in 2008 (N=35 515)

| **Morbidity profile** | | **Adjusted odds-ratio (95% CI)** | **P-value** |
| --- | --- | --- | --- |
| Men | | 1.15 (1.06-1.25) | <0.001 |
| Age | | 1.25 (1.13-1.38) | <0.0001 |
| Age2 | | 1.00 (0.99-1.00) | <0.0001 |
| Age3 | | 1.00 (1.00-1.00) | <0.0001 |
| French region (reference: Paris area) | |  |  |
|  | North-West | 1.28 (1.16-1.42) | <0.0001 |
|  | North-East | 1.12 (1.02-1.24) |
|  | South-West | 1.18 (1.04-1.33) |
|  | South-East | 1.11 (1.00-1.22) |
|  | French West Indies | 1,43 (1,01-2,03) |  |
| **Other cancer (by ICD-10 chapter)** | |  |  |
|  | Lung cancer (II) | 1.22 (1.10-1.36) | <0.001 |
| Esophageal cancer (II) | 1.42 (1.24-1.64) | <0.0001 |
| Cancer other than HNSCC, lung or esophageal (II) | 0.93 (0.86-1.01) | 0.073 |
| Metastasis (II) | 5.37 (4.98-5.79) | <0.0001 |
| Lymph nodes (without metastasis) (II) | 1.32 (1.21-1.43) | <0.0001 |
| **Other causes-of-death (by ICD-10 chapter)** | |  |  |
|  | HIV/AIDS (I) | 1.03 (0.65-1.63) | 0.9 |
| Infectious diseases other than HIV (I) | 1.46 (1.35-1.58) | <0.0001 |
| Blood disorders (III) | 1.31 (1.20-1.42) | <0.0001 |
| Malnutrition (IV) | 1.55 (1.44-1.66) | <0.0001 |
| Endocrine and metabolic disorders (IV) | 0.76 (0.71-0.82) | <0.0001 |
| Mental and behavioral disorders (V) | 0.72 (0.67-0.78) | <0.0001 |
| Diseases of the nervous system (VI) | 1.18 (1.06-1.32) | <0.01 |
| Diseases of the circulatory system (IX) | 0.90 (0.84-0.97) | <0.01 |
| Diseases of the respiratory system (X) | 0.97 (0.90-1.05) | 0.48 |
| Diseases of the liver (XI) | 1.64 (1.44-1.85) | <0.0001 |
| Other diseases of the digestive system (XI) | 0.72 (0.67-0.78) | <0.0001 |
| Diseases of the skin and subcutaneous tissue (XII) | 1.42 (1.23-1.65) | <0.0001 |
| Diseases of the musculoskeletal system and connective tissue (XIII) | 0.69 (0.58-0.81) | <0.0001 |
| Diseases of the urinary system (XIV) | 0.62 (0.54-0.72) | <0.0001 |
| Gynecological diseases (XIV) | 0.30 (0.11-0.81) | <0.05 |
| External causes of mortality (XX) | 0.77 (0.69-0.86) | <0.0001 |
| **Intermediate causes-of-death (by ICD-10 chapter)** | |  |  |
|  | Infectious diseases other than HIV (I) | 1.93 (1.65-2.25) | <0.0001 |
| Endocrine and metabolic disorders (IV) | 0.72 (0.63-0.83) | <0.0001 |
| Diseases of the circulatory system (IX) | 1.55 (1.34-1.80) | <0.0001 |
| Diseases of the respiratory system (X) | 2.83 (2.56-3.14) | <0.0001 |
| Diseases of the liver (XI) | 2.57 (1.95-3.40) | <0.0001 |
| Diseases of the urinary system (XIV) | 1.19 (1.05-1.35) | <0.01 |
| **Other prognostic factors (ICD-10 chapters XVIII and XXI)** | |  |  |
|  | Transplantation status | 0.76 (0.47-1.24) | 0.27 |
|  | Poor health condition | 3.20 (2.95-3.46) | <0.0001 |
| Shock | 3.96 (3.57-4.40) | <0.0001 |
| Bedridden | 4.77 (3.82-5.97) | <0.0001 |
|  | Senility | 1.87 (1.14-3.08) | <0.05 |
| **Hospital trajectory (admission)** | |  |  |
|  | Inpatient care | 1.39 (1.22-1.59) | <0.0001 |
| Day case admission without inpatient care | 0.54 (0.51-0.58) | <0.0001 |
| Emergency room | 2.15 (2.01-2.29) | <0.0001 |
| Post-acute care | 1.11 (1.03-1.20) | <0.05 |
| Daycare at home | 3.06 (2.71-3.45) | <0.0001 |
| Nursing home | 1.42 (1.17-1.72) | <0.001 |

### Supplementary Methods Table 3. Vital status of patients discharged with HNSCC, by year

| **Year** | **Total patients discharged in the year** | **New patients in the year** | **In-hospital death in the year** | **Alive at the end of the year** | **Patients lost to follow-up in the year** | | | **Increase in total deaths after imputation** |
| --- | --- | --- | --- | --- | --- | --- | --- | --- |
| **Total** | **Imputation of death status** | **Imputation of alive status** |
| 2008 | 40 811 | 40 811 (100) | 8 750 (21.4) | 26 765 (65.6) | 5 296 (13.0) | 1 450 (27.4) | 3 846 (72.6) | 1.17 |
| 2009 | 47 008 | 26 232 (55.8) | 9 693 (20.6) | 30 747 (65.4) | 6 568 (14.0) | 1 692 (25.8) | 4 876 (74.2) | 1.17 |
| 2010 | 50 224 | 23 158 (46.1) | 10 142 (20.2) | 32 345 (64.4) | 7 737 (15.4) | 1 793 (23.2) | 5 944 (76.8) | 1.18 |
| 2011 | 52 964 | 21 647 (40.9) | 10 372 (19.5) | 21 195 (60.8) | 10 397 (19.6) | 2 146 (20.6) | 8 251 (79.4) | 1.21 |
| 2012 | 55 074 | 20 505 (37.2) | 10 396 (18.8) | 28 521 (51.8) | 16 157 (29.3) | 2 922 (18.1) | 13 235 (81.1) | 1.28 |
| 2013 | 56 938 | 19 598 (34.4) | 10 383 (18.2) | 404 (0.7) | 46 151 (81.1) | 10 732 (23.3) | 35 419 (76.7) | 2.03 |

### Supplementary Methods Table 4. Cross-validation of mortality rates at 3 years for HNSCC between French cancer registries and the study population

| **Primary head and neck cancer site** | **Study population** | | | | |  | **FRANCIM 2005-2010** | | |
| --- | --- | --- | --- | --- | --- | --- | --- | --- | --- |
| **N** | **(%)** | **In-hospital death and follow-up to last discharge in 2010-2013** |  | **Overall death and complete follow-up to 07/01/2013** |  | **N** | **(%)** | **Survival** |
| Nasal cavity/paranasal sinuses (C30.0;C31) | 2 854 | 5.4% | 46.1 (42.5-49.6) |  | 56.4 (53.8-58.8) |  | 651 | 4.1% | 53 (49-57) |
| Nasopharynx (C11) | 1 781 | 3.3% | 52.9 (48.5-57.1) |  | 57.7 (54.9-60.5) |  | 283 | 1.8% | 61 (56-67) |
| Lip (C00) | 2 157 | 4.1% | 67.8 (63.0-72.2) |  | 73.1 (70.4-75.6) |  | 412 | 2.6% | 80 (76-84) |
| Tongue (C01-C02) | 7 826 | 14.7% | 40.4 (38.6-42.3) |  | 50.8 (49.4 (52.2) |  | 2 376 | 15.0% | 48 (46-50) |
| Oral cavity (C03-C06) | 8 215 | 15.4% | 43.8 (41.9-45.6) |  | 53.5 (52.1-54.9) |  | 2 847 | 18.0% | 53 (51-54) |
| Oropharynx (C09-C10) | 10 424 | 19.6% | 40.2 (38.5-41.9) |  | 50.5 (49.3-51.8) |  | 3 117 | 19.7% | 48 (46-50) |
| Hypopharynx (C12-C13) | 6 579 | 12.4% | 32.6 (30.7-34.5) |  | 40.9 (39.4-42.5) |  | 2 392 | 15.1% | 36 (34-38) |
| Ill-defined head and neck (C14) | 1 360 | 2.6% | 30.9 (27.1-34.8) |  | 36.4 (33.2-40.0) |  | 443 | 2.8% | -- |
| Head and neck (C01-C06; C09-C14) | 41 196 | 77.4% | 42.7 (41.9-43.4) |  | 52.0 (51.4-52.5) |  | 11 458 | 72.3% | 46 (45-47) |
| Larynx (C32) | 12 062 | 22.6% | 52.2 (50.6-53.8) |  | 59.7 (58.6-60.8) |  | 3 316 | 20.9% | 62 (60-64) |
| All head and neck | 53 258 | 100% | 43.6 (42.9-44.3) |  | 53.1 (52.5-53.6) |  | 15 837 | 100% | -- |

FRANCIM : French cancer registries

## Supplementary Table 1: Coding dictionary

| **Variables** | | | **International Classification of Diseases and Related Health Problems, 10th Revision, French version (ICD-10-FR)** | **Ref** |
| --- | --- | --- | --- | --- |
| **HNSCC characteristics at initial treatment (6 months after first diagnosis of HNSCC)** | | | | |
| Primary HNSCC site (primary discharge diagnosis) | | |  | [1](#_ENREF_5_1) |
|  | Malignant neoplasm of nasopharynx | | C11.0-C11.9 |  |
| Malignant neoplasm of nasal cavity or paranasal sinuses | | C30.0; C31.0-C31.9 |  |
| Malignant neoplasm of lip | | C00.0-C00.9 |  |
| Malignant neoplasm of oral cavity (excluding base of tongue, soft palate, and uvula) | | C02.0-C04.9; C05.2; C05.8; C05.9; C06.0-C06.9 |  |
| Malignant neoplasm of oropharynx (including base of tongue, soft palate, and uvula) | | C01; C05.0; C05.1; C09.0-C10.9; C14.2 |  |
| Malignant neoplasm of hypopharynx (including epilarynx) | | C12-C13.9; C32.1 |  |
| Malignant neoplasm of larynx (excluding epilarynx) | | C32.0; C32.2; C32.3; C32.8; C32.9 |  |
| Malignant neoplasm of ill-defined site in HNSCC | | C14.0; C14.8 |  |
| HNSCC stage | | |  | [1](#_ENREF_5_1) |
|  | Metastatic stage (any record of distant metastasis) | | C78.0-C79.9 |  |
| Locally advanced stage | |  |  |
|  | Any ICD-10 record indicating locoregional extension | C00.8; C02.8; C04.8; C05.8; C06.8; C08.8; C09.8; C10.8; C11.8; C13.8; C14.0; C14.8; C77 |  |
| Any treatment record eliminating an early stage | chemotherapy (Z51.1) surgery (HNSCC surgical procedures) and radiotherapy (Z51.0) tracheostomy at index HNSCC diagnosis (Z93.0, Z43.0, J95.0) palliative care (Z51.5) | [2](#_ENREF_5_2),[3](#_ENREF_5_3) |
| Early stage, by default | | -- |  |
| **Comorbidities*** | | | | |
| Second primary cancer | | |  | [4](#_ENREF_5_4),[5](#_ENREF_5_5) |
|  | HNSCC | | Any record at a different primary HNSCC site |  |
|  | Lung cancer | | C33-C34.9 |  |
|  | Oesophageal cancer | | C15.0-C15.9 |  |
|  | Other cancer | | Cxx other than HNSCC, lung cancer, oesophageal cancer, or metastasis |  |
| Charlson comorbidity index other than cancer | | | ICD-10 coding algorithm validated for each comorbidity | [6-9](#_ENREF_5_6) |
|  | Human Immunodeficiency Virus (HIV) infection was added to Acquired Immune Deficiency Syndrome (AIDS) | | Z21; B20-B24 |  |

### Reference

**1.** Amin MB, Edge S, Greene F, et al. *AJCC Cancer Staging Manual, 8th ed.* New-York: Springer-Verlag; 2017.

**2.** Gregoire V, Lefebvre JL, Licitra L, Felip E, Group E-E-EGW. Squamous cell carcinoma of the head and neck: EHNS-ESMO-ESTRO Clinical Practice Guidelines for diagnosis, treatment and follow-up. *Annals of oncology : official journal of the European Society for Medical Oncology / ESMO.* May 2010;21 Suppl 5:v184-186.

**3.** Institut National du Cancer (INCa). *Algorithme de sélection des hospitalisations liées à la prise en charge du cancer dans les bases nationales d'activité hospitalière de court séjour « algorithme cancer » [Algorithm to select cancer-related hospitalizations in the French National Hospital Discharge (PMSI) database].* Boulogne-Billancourt: INCa;2013.

**4.** Working Group R. International rules for multiple primary cancers (ICD-0 third edition). *European journal of cancer prevention : the official journal of the European Cancer Prevention Organisation.* Aug 2005;14(4):307-308.

**5.** Jegu J, Colonna M, Daubisse-Marliac L, et al. The effect of patient characteristics on second primary cancer risk in France. *BMC cancer.* 2014;14:94.

**6.** Charlson ME, Pompei P, Ales KL, MacKenzie CR. A new method of classifying prognostic comorbidity in longitudinal studies: development and validation. *Journal of chronic diseases.* 1987;40(5):373-383.

**7.** Quan H, Sundararajan V, Halfon P, et al. Coding algorithms for defining comorbidities in ICD-9-CM and ICD-10 administrative data. *Medical care.* Nov 2005;43(11):1130-1139.

**8.** Quan H, Li B, Couris CM, et al. Updating and validating the Charlson comorbidity index and score for risk adjustment in hospital discharge abstracts using data from 6 countries. *American journal of epidemiology.* Mar 15 2011;173(6):676-682.

**9.** Bannay A, Chaignot C, Blotiere PO, et al. The Best Use of the Charlson Comorbidity Index With Electronic Health Care Database to Predict Mortality. *Medical care.* Feb 2016;54(2):188-194.

## Supplementary Table 2: Imputation of radiation therapy in the private sector

| **Initial HNSCC location and stage at initial care** | | **All incident patients** | **Radiation therapy** | |
| --- | --- | --- | --- | --- |
| **Observed in public sector** | **Overall after imputation in private sector** |
| **All HNSCC** | | 53,257 (100) | 18,583 (34.9) | 30,832 (57.9) |
|  | Early stage (I/II) | 15,749 (29.6) | 1,724 (11.0) | 6,292 (40.0) |
| Locally advanced stage (III/IVb) | 32,723 (61.4) | 15,252 (46.6) | 22,933 (70.1) |
| Distant metastasis (IVc) | 4,785 (9.0) | 1,607 (33.6) | |
| **Nasal cavity/paranasal sinuses (C30.0;C31)** | | 2,854 (5.4) | 1,042 (36.5) | 1,523 (53.4) |
|  | Early stage (I/II) | 1,266 (44.4) | 146 (11.5) | 462 (36.5) |
| Locally advanced stage (III/IVb) | 1,303 (45.7) | 769 (59.0) | 934 (71.7) |
| Distant metastasis (IVc) | 285 (10.0) | 127 (44.6) | |
| **Nasopharynx (C11)** | | 1,781 (3.3) | 725 (40.7) | 1,215 (68.2) |
|  | Early stage (I/II) | 389 (21.8) | 45 (11.6) | 389 (100) |
| Locally advanced stage (III/IVb) | 1,187 (66.7) | 609 (51.3) | 1,187 (100) |
| Distant metastasis (IVc) | 205 (11.5) | 71 (34.6) | |
| **Lip (C00)** | | 2,157 (4.0) | 211 (9.8) | 343 (15.9) |
|  | Early stage (I/II) | 1,857 (86.1) | 115 (6.2) | 238 (12.8) |
| Locally advanced stage (III/IVb) | 257 (11.9) | 86 (33.5) | 95 (37.0) |
| Distant metastasis (IVc) | 43 (2.0) | 10 (23.3) | |
| **Tongue (C01-C02)** | | 7,826 (14.7) | 2,743 (35.1) | 4,328 (55.3) |
|  | Early stage (I/II) | 2,305 (29.4) | 146 (6.3) | 844 (36.6) |
| Locally advanced stage (III/IVb) | 4,891 (62.5) | 2,378 (48.6) | 3,265 (66.8) |
| Distant metastasis (IVc) | 6,30 (8.1) | 219 (34.8) | |
| **Oral cavity (C03-C06)** | | 8,215 (15.4) | 2,826 (34.4) | 4,222 (51.4) |
|  | Early stage (I/II) | 2,709 (33.0) | 263 (9.7) | 263 (9.7) |
| Locally advanced stage (III/IVb) | 4,839 (58.9) | 2,324 (48.0) | 3,003 (62.1) |
| Distant metastasis (IVc) | 667 (8.1) | 239 (35.8) | |
| **Oropharynx (C09-C10)** | | 1,0424 (19.6) | 4,481 (43.0) | 6,979 (67.0) |
|  | Early stage (I/II) | 1,681 (16.1) | 283 (16.8) | 1,099 (65.4) |
| Locally advanced stage (III/IVb) | 7,721 (74.1) | 3,861 (50.0) | 5,543 (71.8) |
| Distant metastasis (IVc) | 1,022 (9.8) | 337 (33.0) | |
| **Hypopharynx (C12-C13)** | | 6,579 (12.4) | 2,806 (42.7) | 4,383 (66.6) |
|  | Early stage (I/II) | 802 (12.2) | 172 (21.5) | 643 (80.2) |
| Locally advanced stage (III/IVb) | 4,906 (74.6) | 2,335 (47.6) | 3,441 (70.1) |
| Distant metastasis (IVc) | 871 (13.2) | 299 (34.3) | |
| **Ill-defined HNSCC (C14)** | | 1,360 (2.6) | 355 (26.1) | 544 (40.0) |
|  | Locally advanced stage (III/IVb) | 1,170 (86.0) | 302 (25.8) | 491 (42.0) |
| Distant metastasis (IVc) | 190 (14.0) | 53 (27.9) | |
| **Larynx (C32)** | | 1,2061 (22.6) | 3,394 (28.1) | 6,074 (50.4) |
|  | Early stage (I/II) | 4,740 (39.3) | 554 (11.7) | 2,354 (49.7) |
| Locally advanced stage (III/IVb) | 6,449 (53.5) | 2,588 (40.1) | 4,974 (77.1) |
| Distant metastasis (IVc) | 872 (7.2) | 252 (28.9) | |

Legend: Initial HNSCC site was defined from the primary discharge diagnosis recorded at first HNSCC surgery or panendoscopy (81%), and otherwise the first primary (10%) or secondary (9%) discharge diagnosis. Of 53,257 patients, 2 patients at early stage had a single hospital stay with a billing error and were excluded from the main analysis.
